# Supplementary material for: ASO-based PKM Splice-switching Therapy Inhibits Hepatocellular Carcinoma Cell Growth
Source: bioRxiv or medRxiv preprint supplement (doi:10.1101/2020.09.01.278580), 2021-10-14

**A**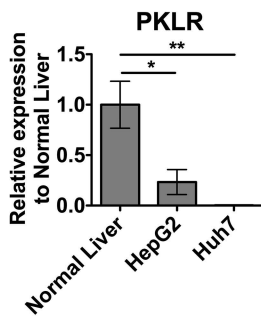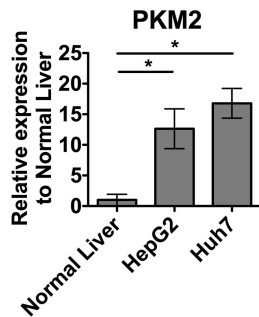**B**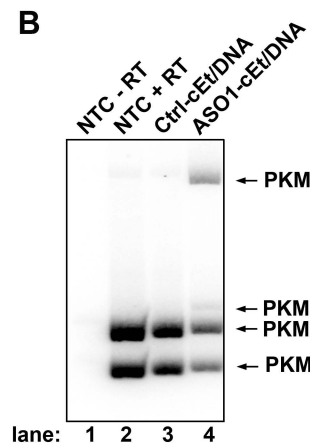**C**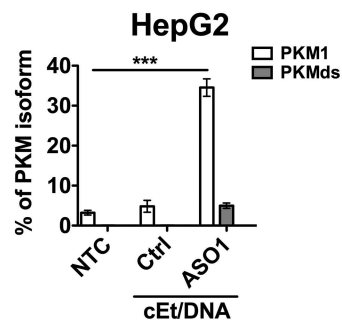**D**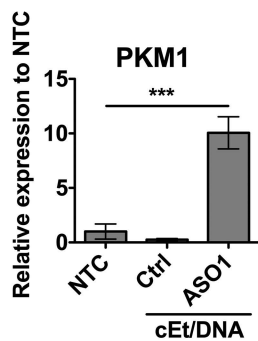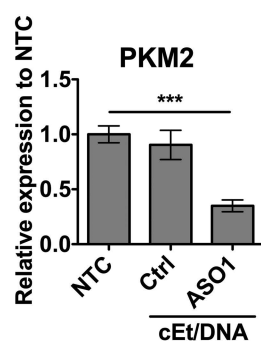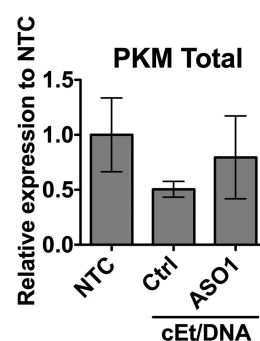**E**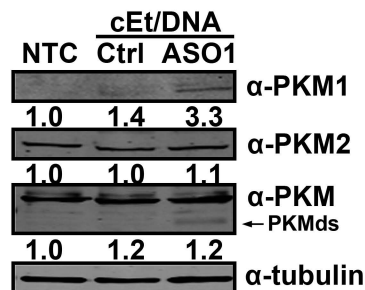**F**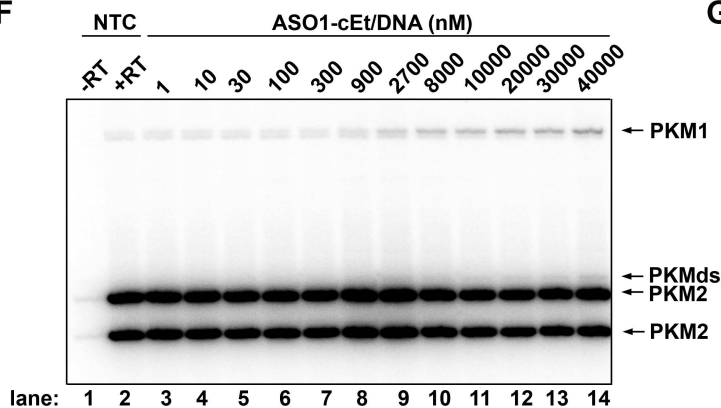**G**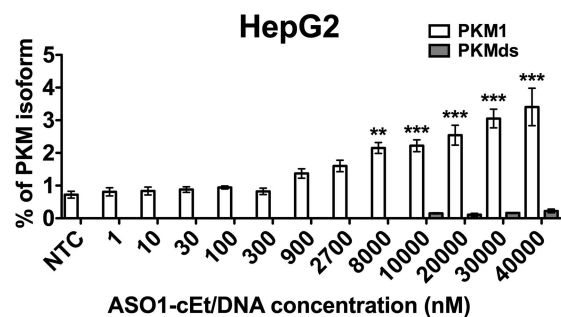**H**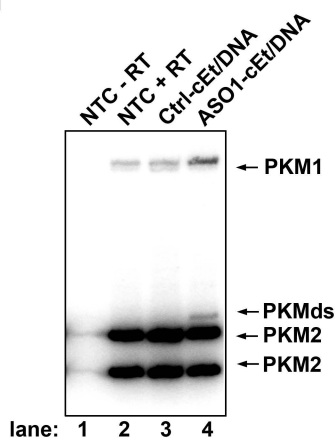**I**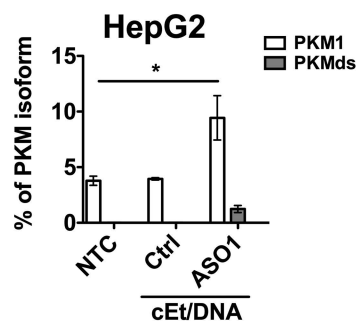**J**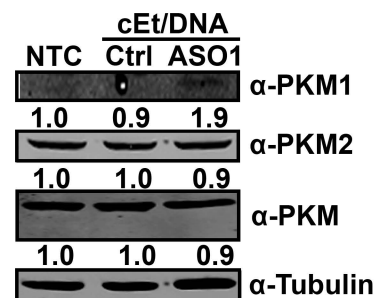

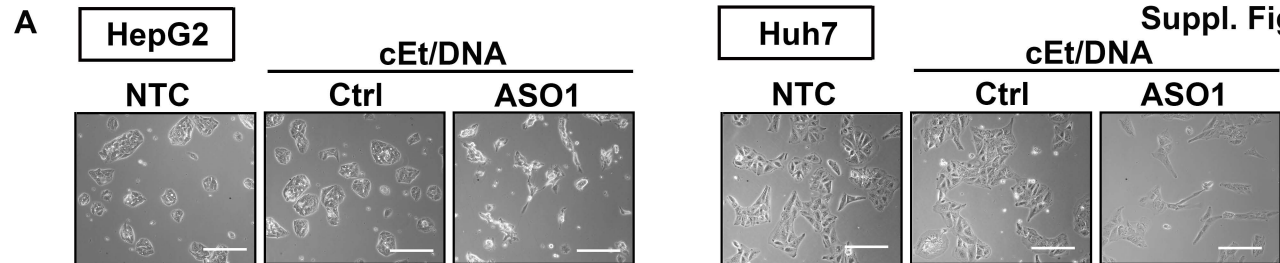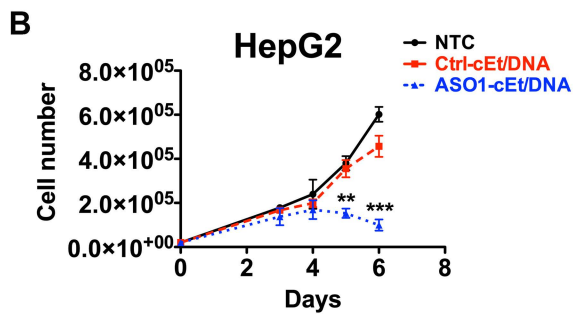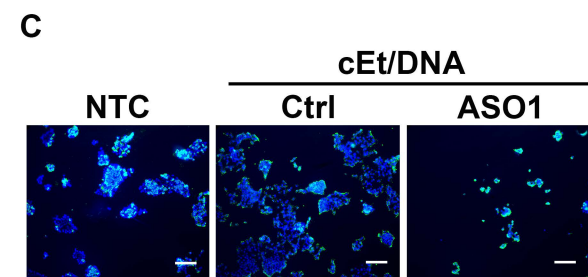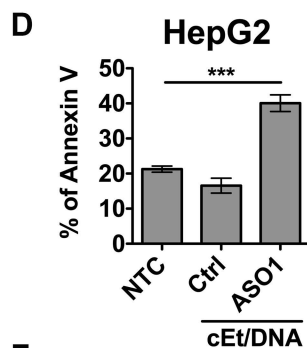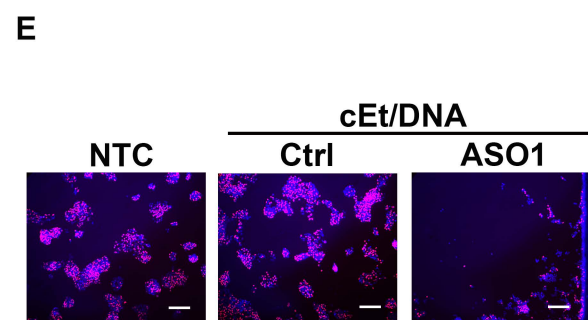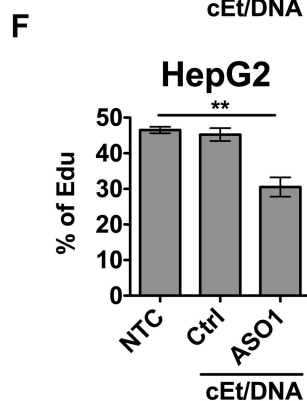

## Lentiviral expression constructs

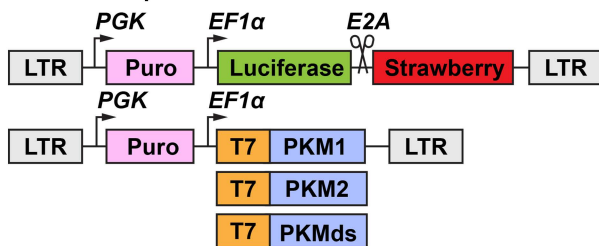

B

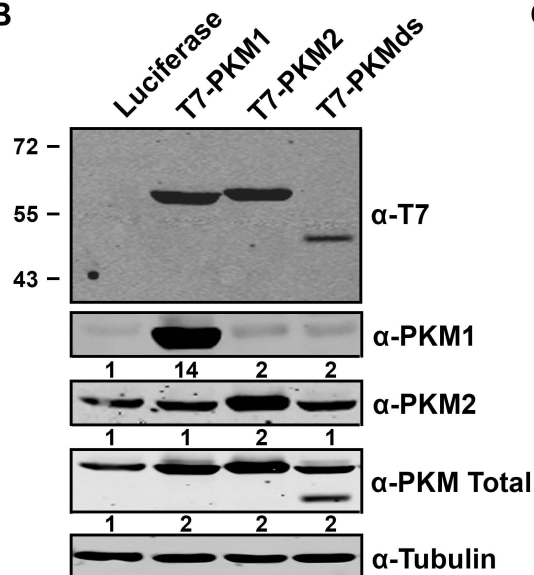

C

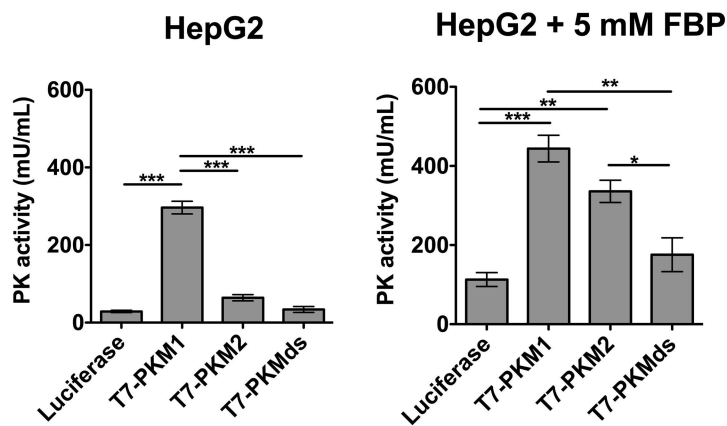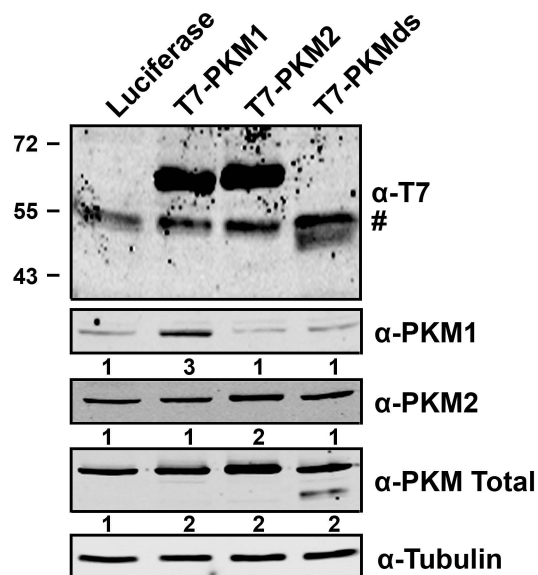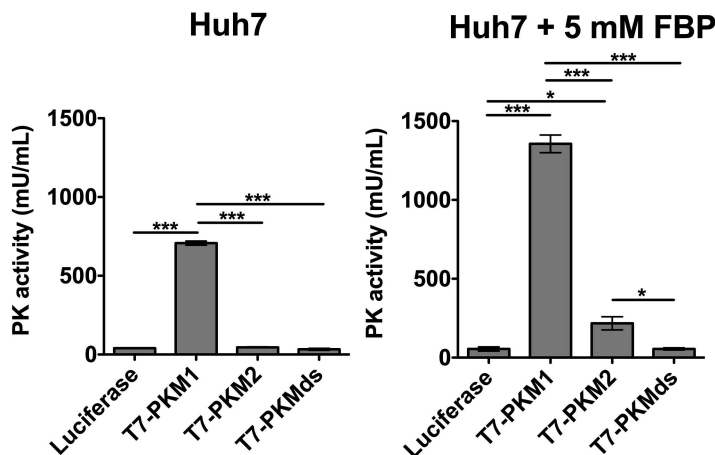

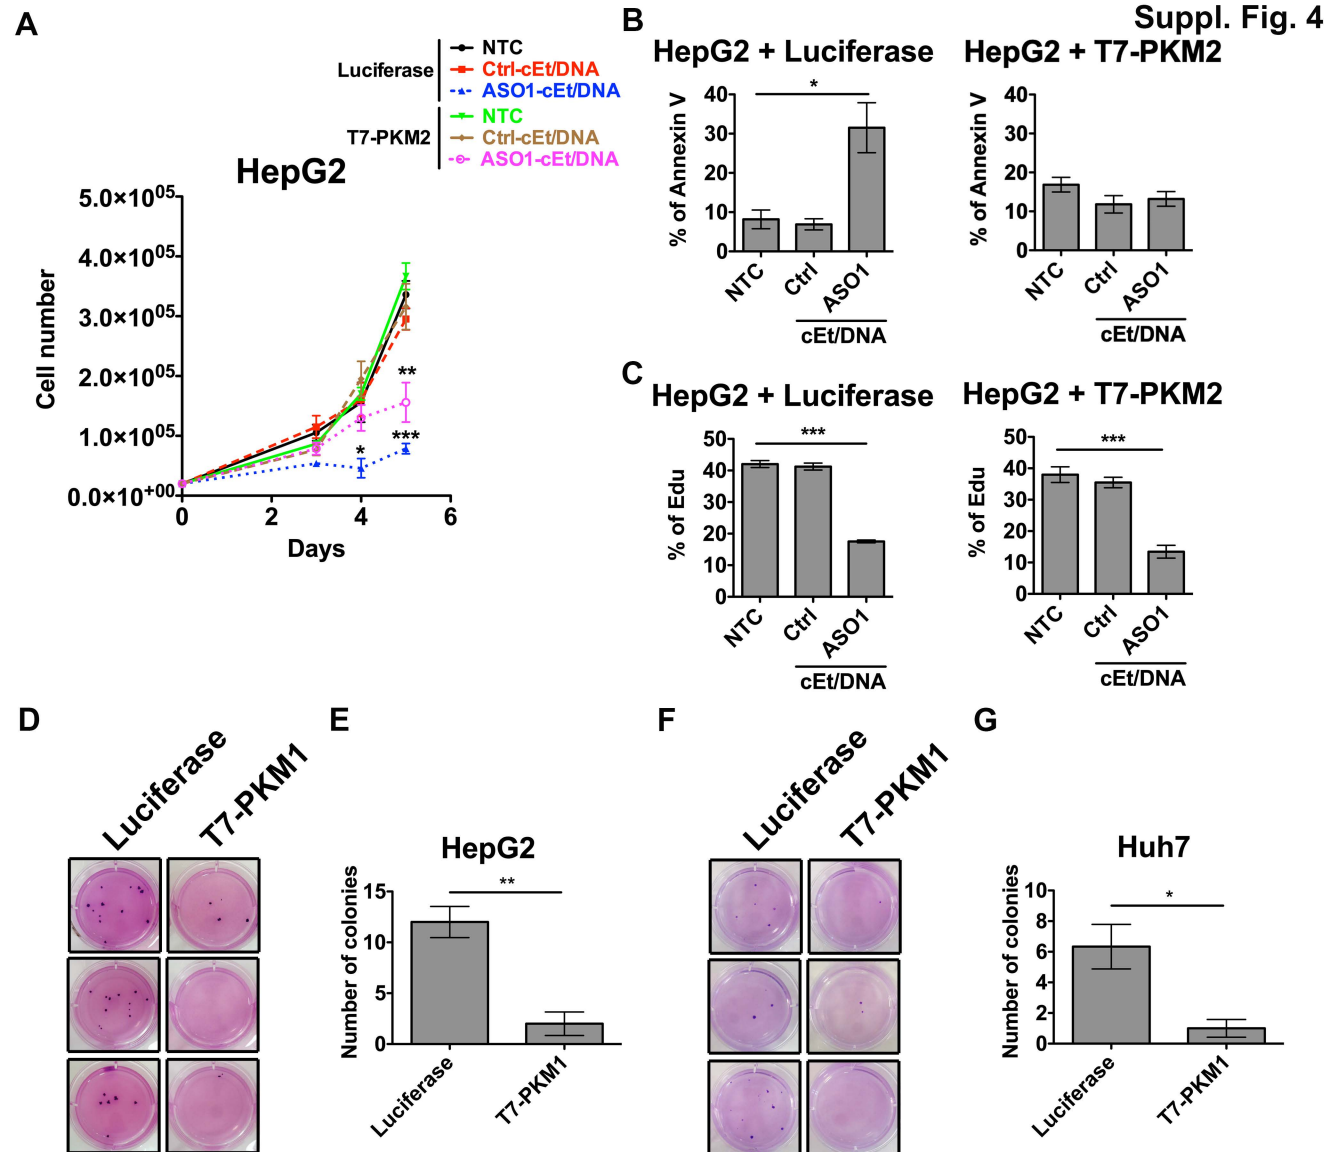

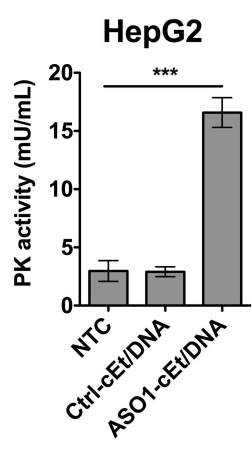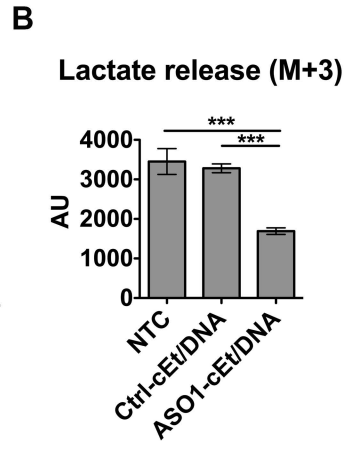

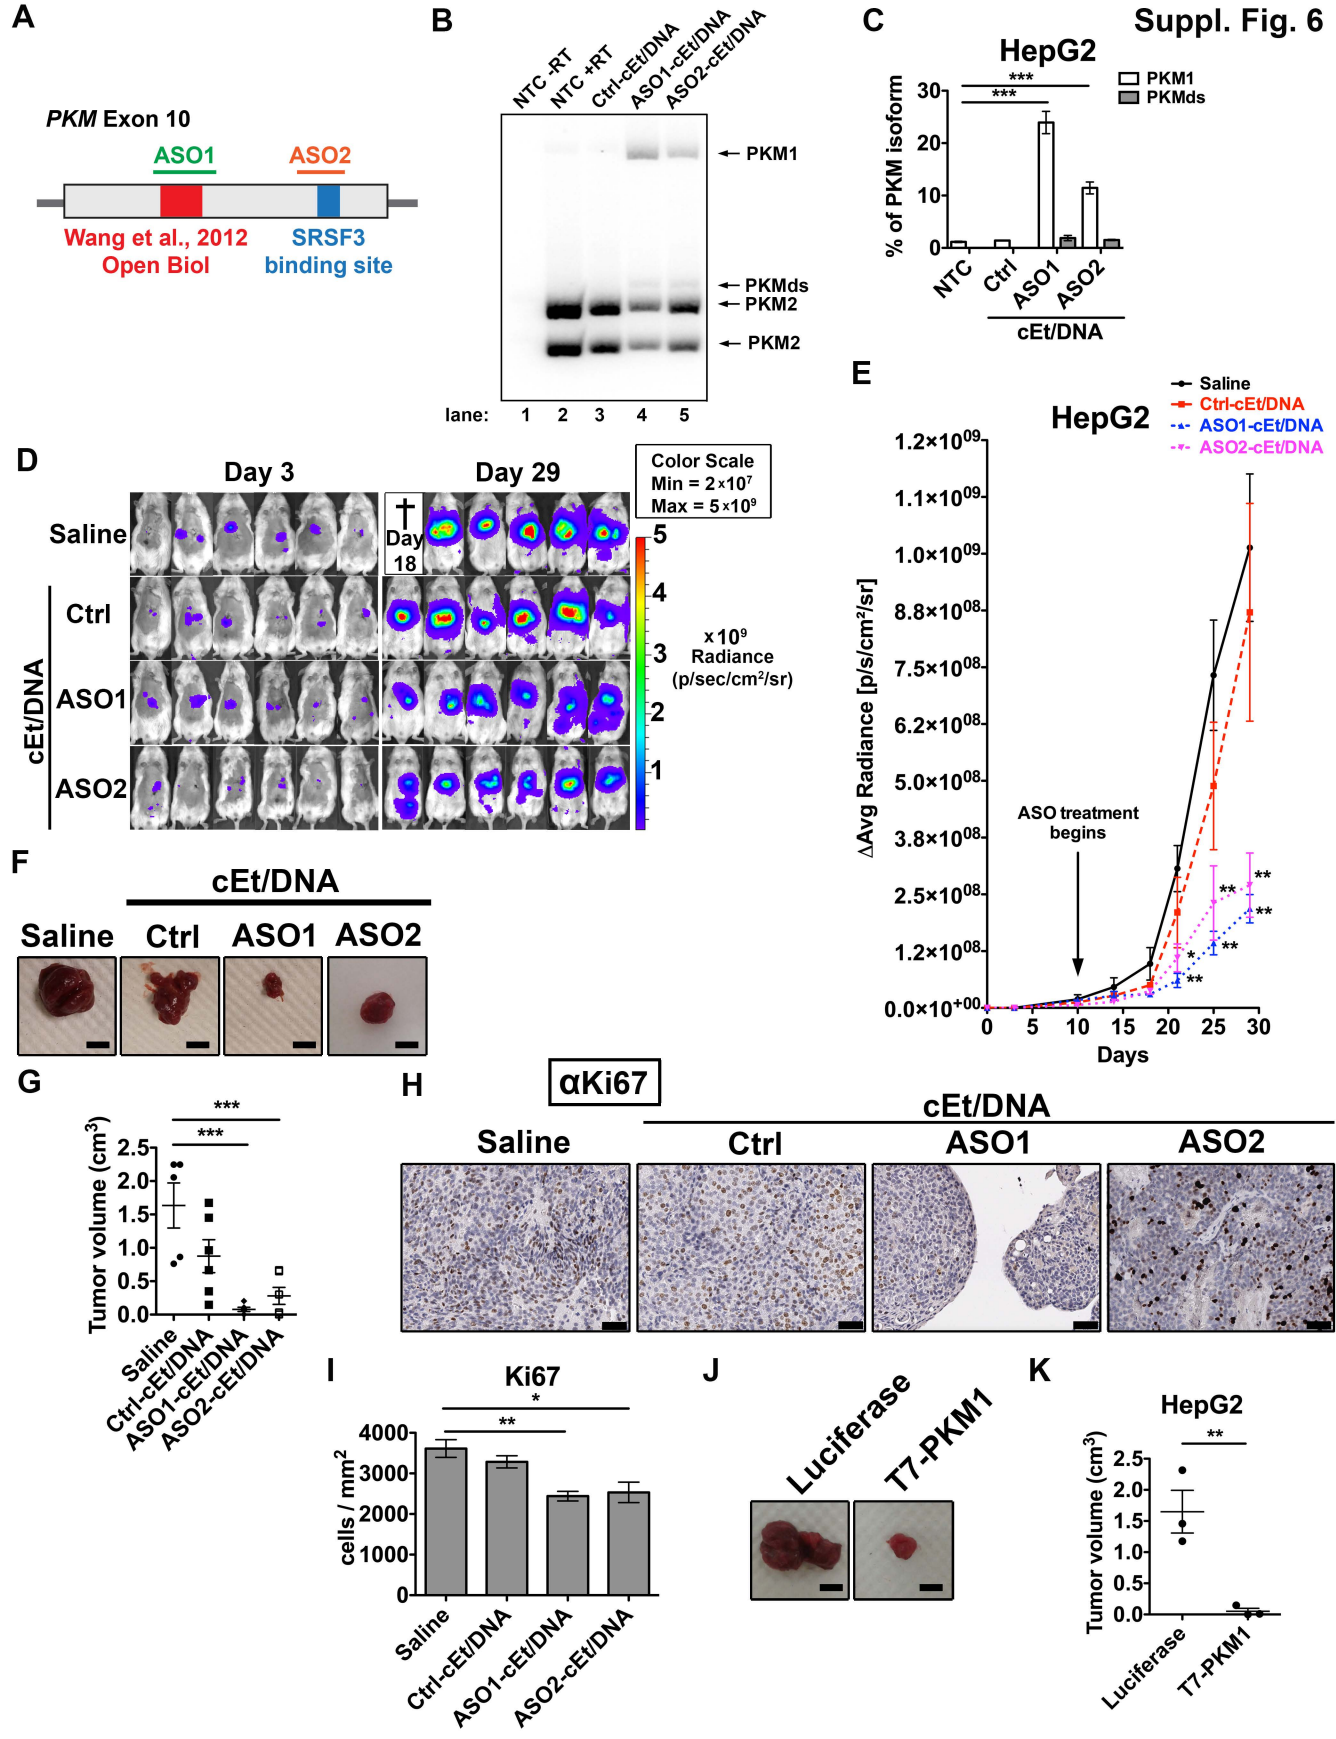

A

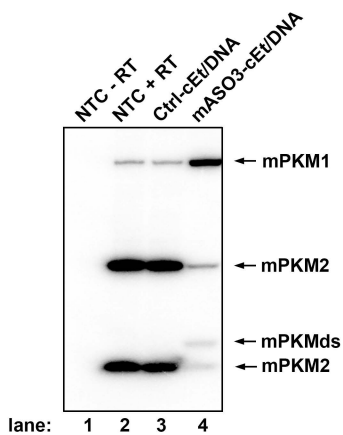

B

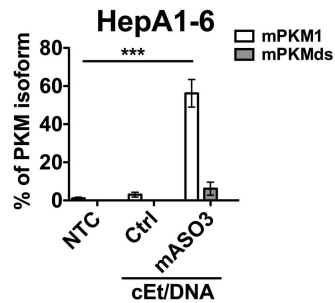

C

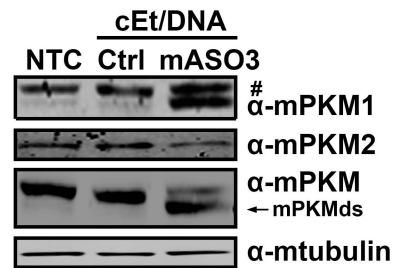

D

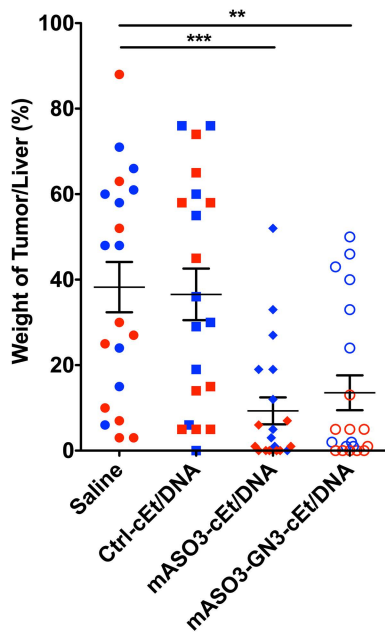

E

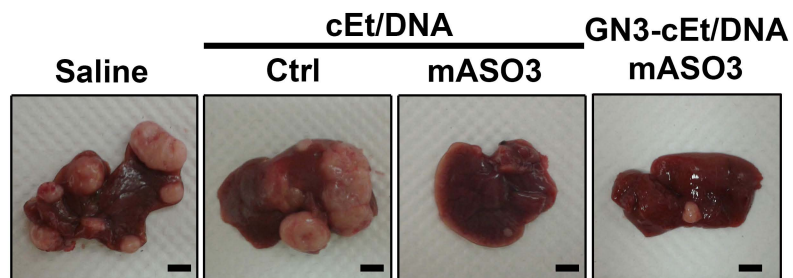

F

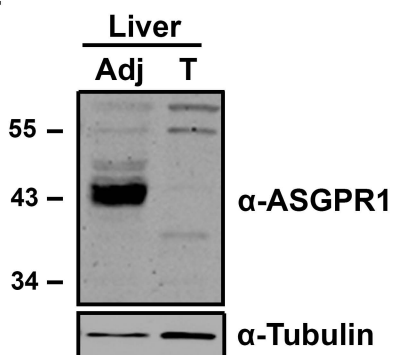

Supplement: Supplementary file [file media-1.pdf]
